# Supplementary material
Source: MDPI journal article supplement (https://www.mdpi.com/2072-4292/15/22/5396)
Supplement: s1 [file s1]

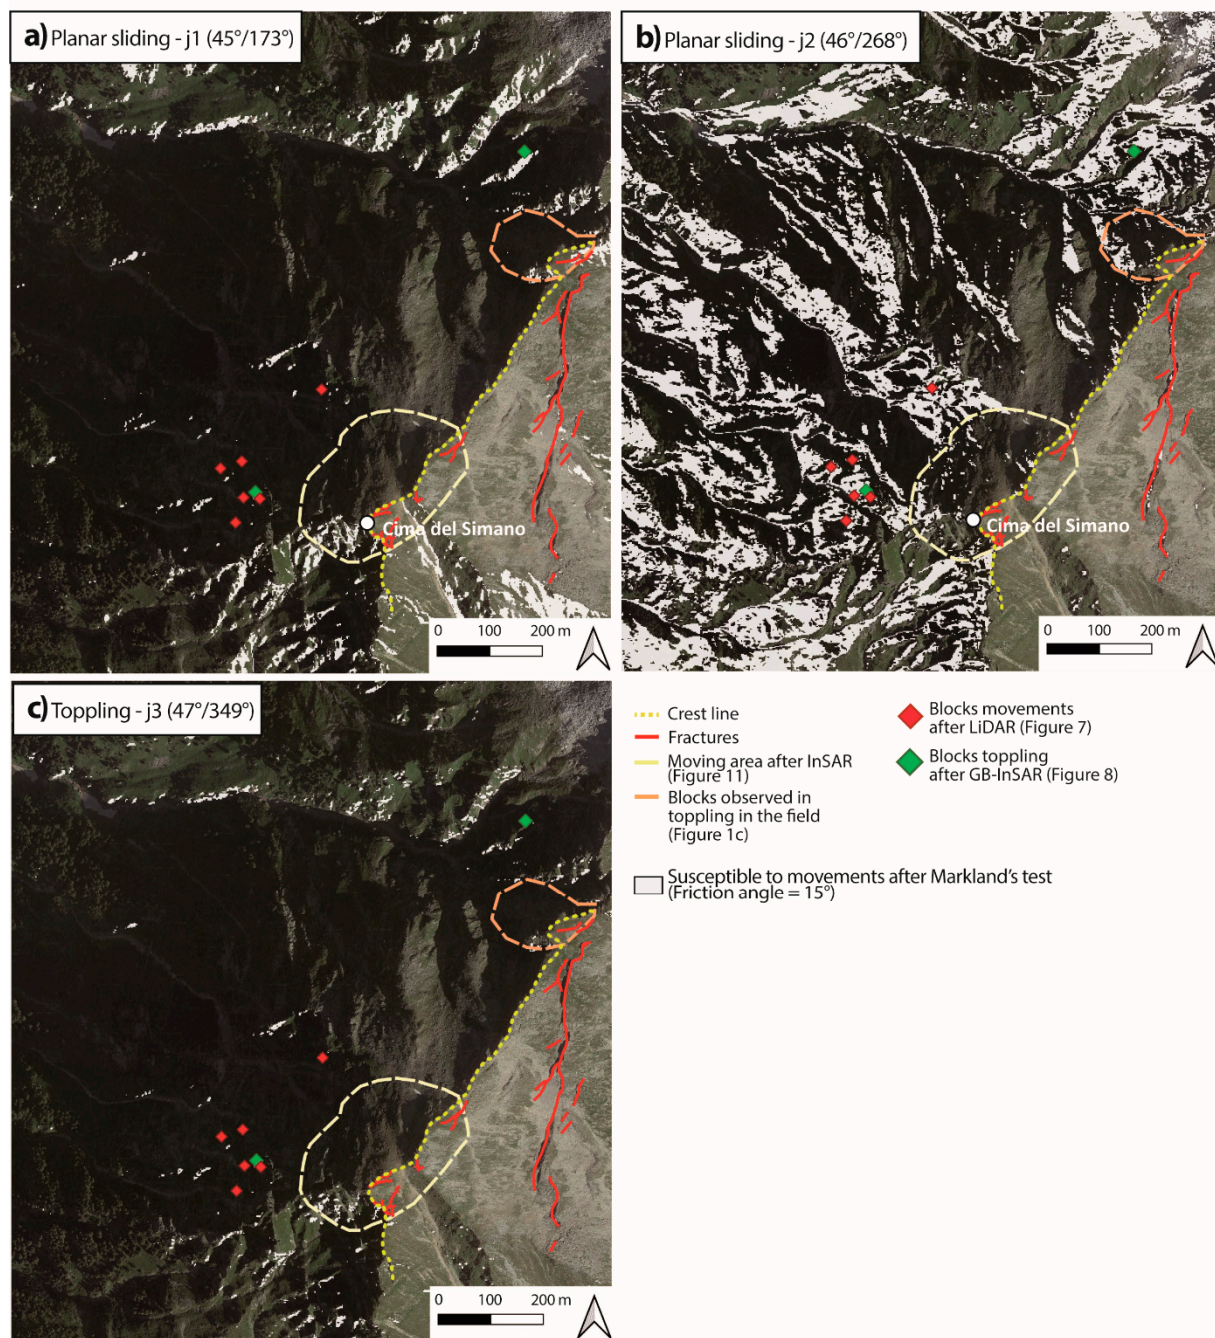

**Figure S1.** Markland's tests for planar sliding and toppling with the discontinuity sets detected in the Swisstopo DEM for a friction angle of 15°. Angles of lateral limits are 20°. (a) Susceptibility to planar sliding considering planes from j1. (b) Susceptibility to planar sliding considering planes from j2. (c) Susceptibility to toppling considering planes from j3.
